# Supplementary material for: Deciphering the mechanistic insights of 4-nitrophenol reduction catalyzed by a 1D–2D Bi2S3 nanostructured catalyst
Source: Royal Society of Chemistry journal article supplement (doi:10.1039/d4nr00153b), 2024-01-01
Supplement: d4nr00153b1.pdf [file d4nr00153b1.pdf]

## **Deciphering the mechanistic insights of 4-nitrophenol reduction catalyzed by 1D-2D Bi<sub>2</sub>S<sub>3</sub> nanostructured catalyst**

Bhagirath Mahto, Ashok Barhoi, Haider Ali and Sahid Hussain\*

Department of Chemistry, Indian Institute of Technology Patna, Bihta, 801103

Email: [sahid@iitp.ac.in](mailto:sahid@iitp.ac.in); Phone: +91-6115-233022

### **Text S1. Materials**

Bismuth (III) nitrate pentahydrate (Bi(NO<sub>3</sub>)<sub>3</sub>·5H<sub>2</sub>O, >98%) and thiourea (>99%) were purchased from the Central Drug House (P) Ltd. (New Delhi, India) and Tokyo Chemical Industry Co. Ltd. (Tokyo, Japan) respectively. Sodium borohydride (99%), deuterated sodium borohydride (98 atom % D), and deuterium oxide (99.9 atom % D) were purchased from Sigma-Aldrich. 4-Nitrophenol (99%), polyvinylpyrrolidone (average mol wt. 40,000), and 3-nitrophenol (>98%) were purchased from Alfa Aesar. 2-Nitrophenol (> 99) was purchased from Sisco Research Laboratories (SRL) Pvt. Ltd. - India. Ethanol was purchased from Merck. The chemicals mentioned above are used directly without further purification.

### **Text S2. Catalysts characterization**

Powder X-ray diffraction (P-XRD) data were recorded in the 2θ range of 10-80° at a step of 0.02° on a PANalytical X-ray diffractometer with Cu Kα (λ = 1.5406 Å) radiation having tube voltage 45 kV and tube current 40 mA. The phases of as-synthesized materials were identified using the Joint Committee on Powder Diffraction Standards (JCPDS) database. A Perkin Elmer spectrum 400 FT-IR (Fourier transform infrared) spectrophotometer (United States) was used for FTIR measurements in the KBr pellets mode with the number of scans 32 in the wavenumber range

4000–400  $\text{cm}^{-1}$  with a resolution of 4  $\text{cm}^{-1}$ . Quantachrome Autosorb iQ<sub>2</sub> specific surface analyzer was used to test the samples' specific surface area, pore size, and pore volume at 77 K using N<sub>2</sub> adsorption-desorption isotherm. Prior to the measurements, the sample was degassed under a vacuum for 6 hours at 90 °C. The Brunauer-Emmett-Teller (BET) specific surface area was calculated from the adsorption data in the relative pressure ( $P/P_0$ ) range from 0.05 to 0.35. Pore size distribution was estimated using Barrett–Joyner–Halenda (BJH) method using desorption branch of N<sub>2</sub> isotherm. Thermogravimetric analysis (TGA) was performed on an SDT Q600 instrument with a controlled heating rate of 10 °C/min in an N<sub>2</sub> environment from room temperature to 800 °C. The reduction properties of the 1D-2D Bi<sub>2</sub>S<sub>3</sub> were evaluated by the temperature-programmed reduction (TPR, Quantachrome, TPRwin v3.52, USA) equipped with a thermal conductivity detector (TCD). Approximately 60 mg of material was used for the TPR study. The temperature was raised from ambient to 800 °C at 10 °C min<sup>-1</sup> under a flow rate of 50 ml min<sup>-1</sup> of H<sub>2</sub> (10%)/Ar. Diffuse reflectance spectroscopy (DRS) was recorded with a UV–vis spectrophotometer (Shimadzu UV2600) using BaSO<sub>4</sub> as a reflectance standard. Dynamic light scattering (DLS) analysis for hydrodynamic diameter was measured by Litesizer 500 particle analyzer from Anton Paar. The field emission scanning electron microscopy (FE-SEM) micrographs were obtained using a Zeiss Gemini SEM500 instrument coupled with an energy dispersive spectroscopy (EDS) detector. The transmission electron microscopy (TEM) and high-resolution TEM (HR-TEM) micrographs were obtained using a JEOL JEM 200 electron microscope at an acceleration voltage of 200 kV. The powder material was dispersed in ethanol, and then a drop of the suspension was deposited on the carbon film of the 200 nm mesh copper grids and then dried overnight. Finally, the UV-visible (UV–Vis) spectra were obtained using a spectrophotometer (Shimadzu UV2550) to study the catalytic reduction of 4-nitrophenol.

### **Text S3. Fabrication of Bi<sub>2</sub>S<sub>3</sub> electrode**

Firstly, the 5 mm glassy carbon electrode (GCE) is cleaned with 0.05 μm alumina slurry using a polishing kit, followed by rinsing with ethanol and deionized water and drying overnight at room temperature. To create the catalyst ink for making the working electrode, a mixture is prepared by combining 5 mg of Bi<sub>2</sub>S<sub>3</sub> with 0.5 ml of ethanol and adding 10 μl of a 5 wt% Nafion solution to act as a binder. This mixture is then subjected to sonication until it becomes uniformly blended. Further, 10 μl of Bi<sub>2</sub>S<sub>3</sub> ink was drop cast on the precleaned GCE to fabricate the Bi<sub>2</sub>S<sub>3</sub> working electrode and dried overnight at 40 °C. Bi<sub>2</sub>S<sub>3</sub>/GCE was used for the electrochemical study of the mechanism of 4-NP reduction.

### **Text S4. Large scale catalytic reduction of 4-NP**

Typically, 4-NP is present in industrial wastewater at a significant level, with concentrations usually exceeding 2 g·L<sup>-1</sup> (equivalent to about 14.38 mM). To assess the effectiveness of the catalysts in treating wastewater containing high concentration of 4-NP, experiments were conducted using higher concentrations of 4-NP. Initially, a glass vial was filled with 10 ml of a 4-NP solution with a concentration of 15 mM. While stirring continuously, 60 mg of NaBH<sub>4</sub> was introduced into the solution, followed by adding 10 mg of catalyst. The UV-Vis absorption spectroscopic measurement was used to confirm the completion of the reaction. To ensure the presence of the reduced product 4-AP, a cuvette was filled with 200 μl of the reduced solution and 2.3 ml of deionized water, and the UV-Vis spectrum was measured.

### **Text S5. Large scale synthesis of 4-NP for spectroscopic measurements**

To obtain more reduction products of 4-AP for spectroscopic measurements, a large-scale synthesis was performed following the procedures described below. Initially, 15 mg of 4-NP was dissolved in 3 mL of water under magnetic stirring in a glass vial. Following this, 10 mg of the

catalyst was added. Next, 30.0 mg of solid NaBH<sub>4</sub> was promptly introduced into the reaction container. Once the reaction was finished, its completion was confirmed using UV-Vis absorption spectroscopy, where the characteristic peak of 4-NP at approximately 400 nm vanished. Subsequently, the solution was extracted three times with 5 mL of ethyl acetate, and the products present in the organic phase were collected and dried over anhydrous sodium sulfate (Na<sub>2</sub>SO<sub>4</sub>). Finally, the reduced products were acquired by evaporating the solvent under reduced pressure conditions.

#### **Text S6. Calculation of crystallite size**

The crystallite size of Bi<sub>2</sub>S<sub>3</sub> nanoparticles was calculated using the Debye-Scherrer formula, which can be expressed as  $D = k\lambda/(\beta\cos\theta)$ . In this formula, D represents the grain size,  $\lambda$  is the wavelength, k is a shape factor with a value of 0.9,  $\beta$  is the full width at half maximum (FWHM) of the corresponding XRD peak, and  $\theta$  is the Bragg angle of the most intense peak.

#### **Text S7. Reduction of 4-NP in the presence of molecular H<sub>2</sub> gas**

Molecular hydrogen gas (H<sub>2</sub>) was employed to reduce 4-NP under ambient conditions. In a typical procedure, 100 ml of a 0.1 mM 4-NP solution was mixed with 20 mg of BS-2 catalyst in a conical flask and stirred for 30 minutes to achieve adsorption-desorption equilibrium. Following this, the solution was continuously purged with H<sub>2</sub> gas for 1h, and time-dependent UV-Vis spectra were recorded to observe changes in 4-NP concentration and the formation of the product 4-AP. However, even after one hour, there was no alteration in the absorption of 4-NP at 317 nm, indicating that molecular H<sub>2</sub> did not reduce 4-NP in the presence of the Bi<sub>2</sub>S<sub>3</sub> (BS-2) catalyst under ambient conditions.

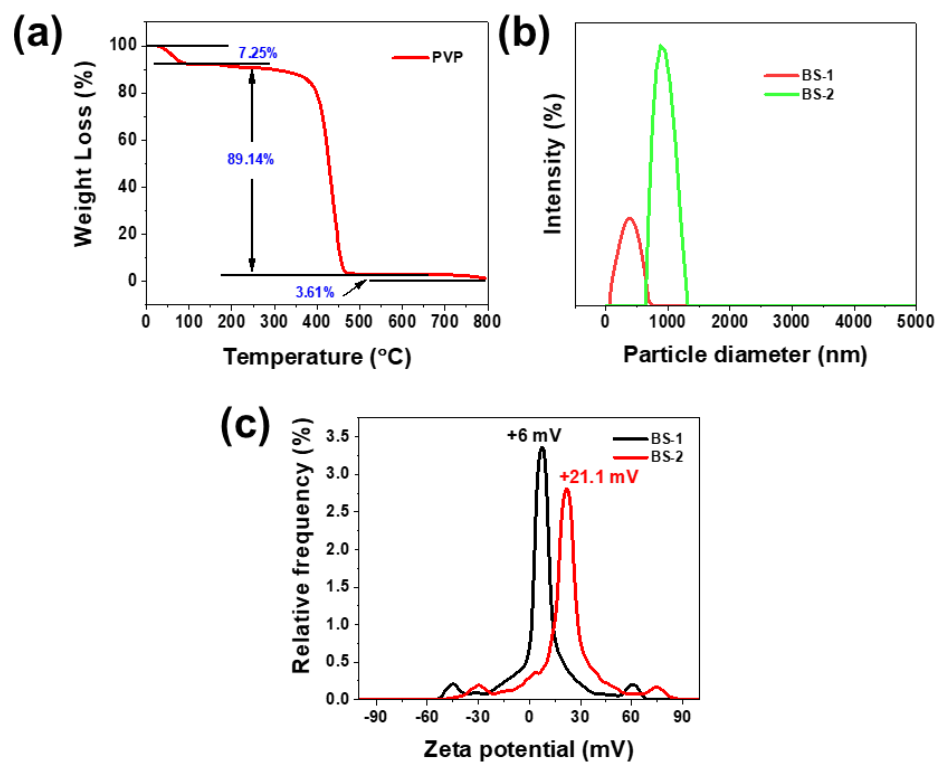

**Fig. S1** (a) TGA of PVP; (b)DLS of BS-1 and BS-2; and (c) Zeta potential of BS-1 and BS-2.

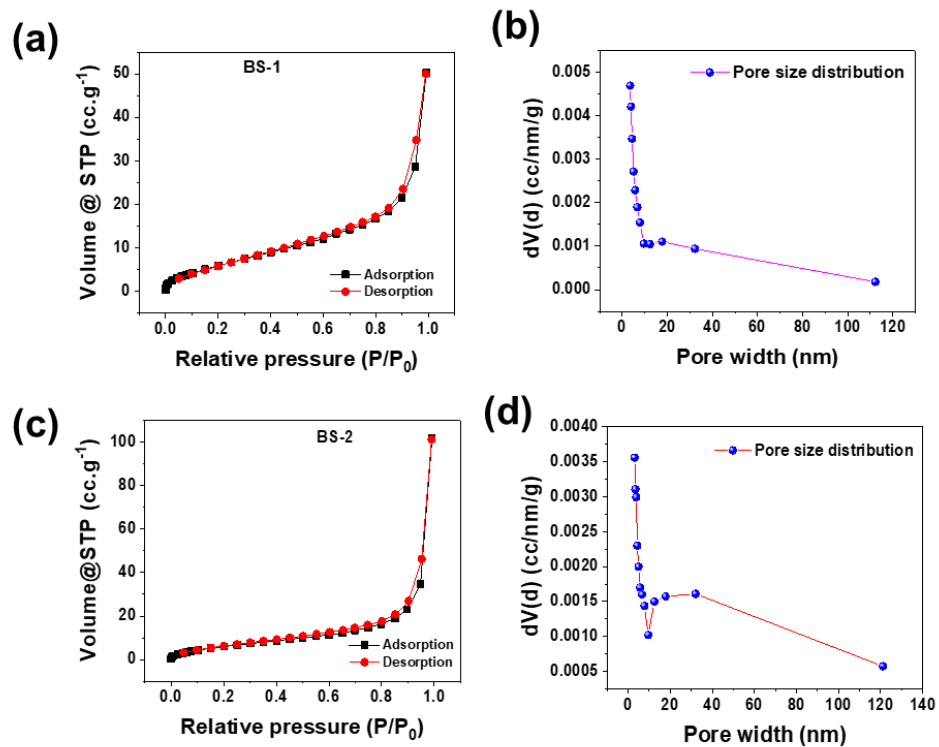

**Fig. S2** (a) N<sub>2</sub> adsorption-desorption isotherm and (b) BJH pore size distribution of BS-1; (c) N<sub>2</sub> adsorption-desorption isotherm and (c) BJH pore size distribution of BS-2.

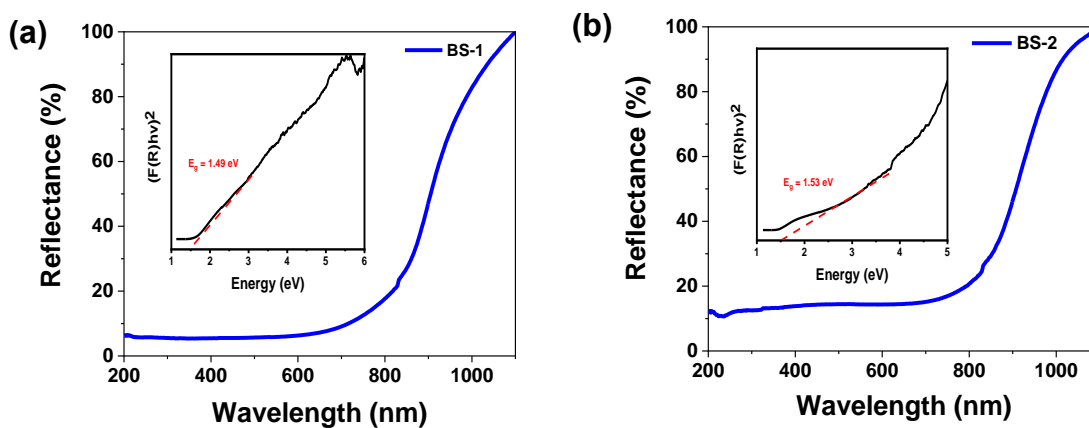

**Fig. S3** DRS spectra with inset Kubelka-Munk plot of (a) BS-1 and (b) BS-2.

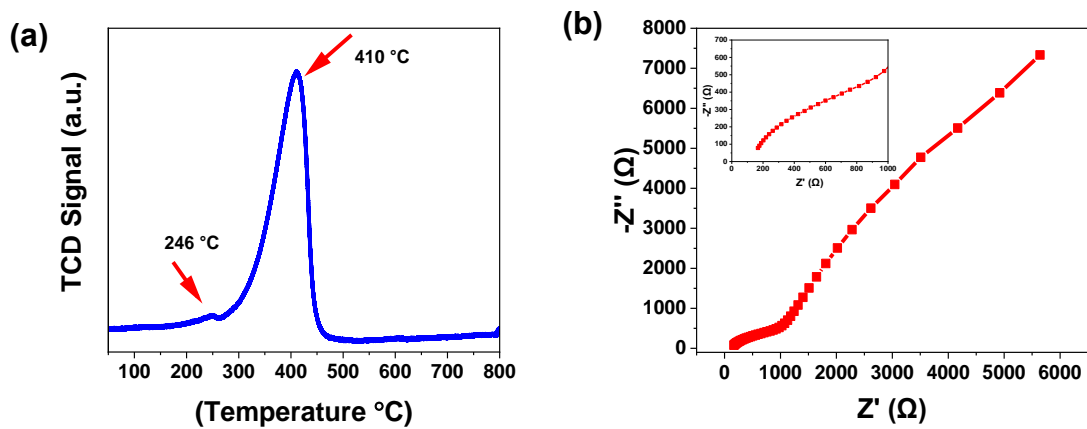

**Fig. S4** (a) H<sub>2</sub> TPR of BS-2 and (b) Nyquist plot of BS-2.

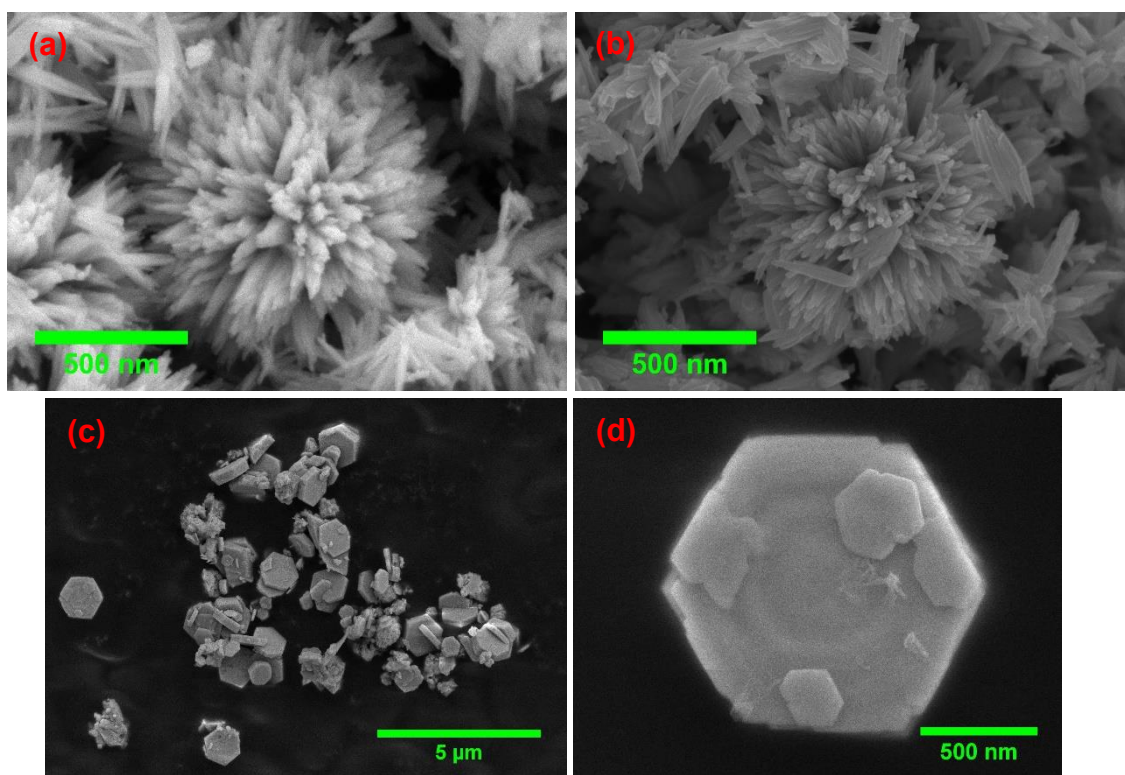

**Fig. S5** FE-SEM micrographs of (a) BS-1 SE2 mode; (b) BS-1 InLens mode, (c) and (d) of BS-2 in SE2 modes.

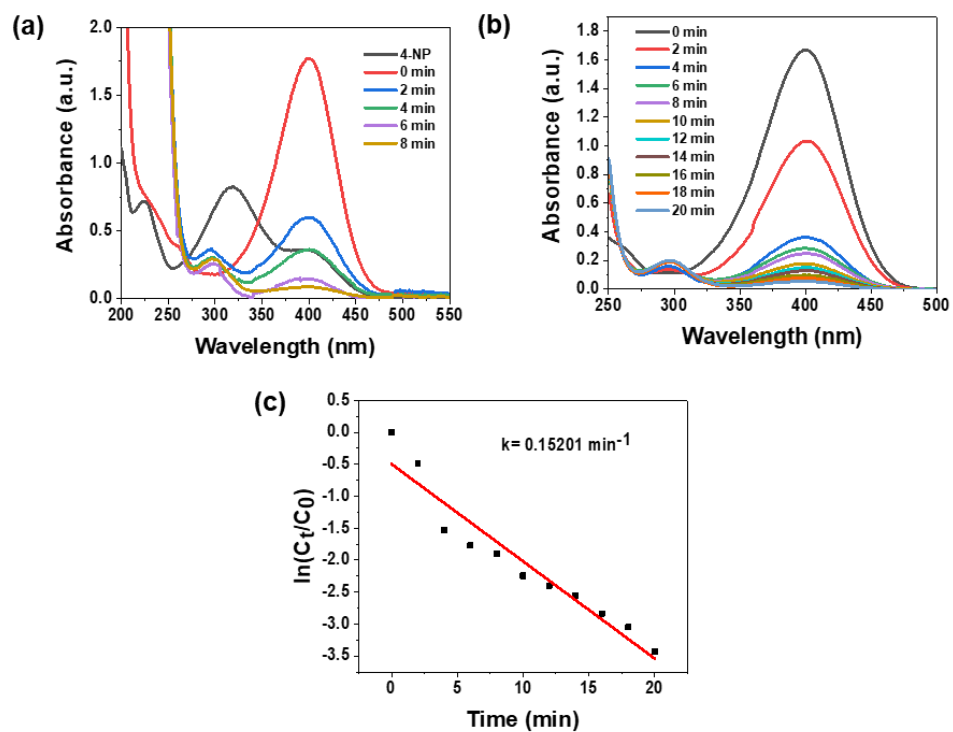

**Fig. S6** UV-Vis spectra of 4-NP reduction(a) in the presence of BS-2; (b) in the presence of BS-1; and (c) plot of  $\ln(C_t/C_0)$  vs time for BS-1. (Conditions:  $[4\text{-NP}] = 76.9 \mu\text{M}$ ,  $[\text{NaBH}_4] = 20.3 \text{ mM}$ ,  $[\text{Cat}] = 0.2 \text{ g/L}$ ).



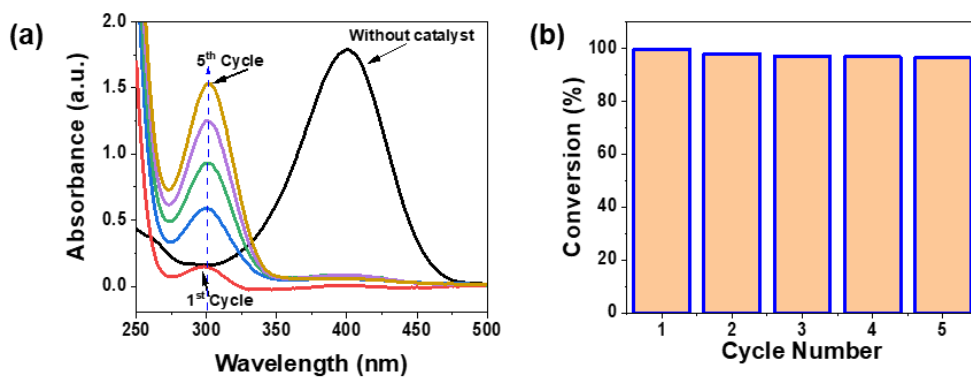

**Fig. S7** (a) Time-dependent UV-Vis spectra of 4-NP reduction by BS-2 for 5 cycles, (b) Conversions at the end of each cycle. (Initial Conditions: [4-NP] = 76.9  $\mu$ M, [NaBH<sub>4</sub>] = 20.3 mM, [Cat] = 0.2 g/L).

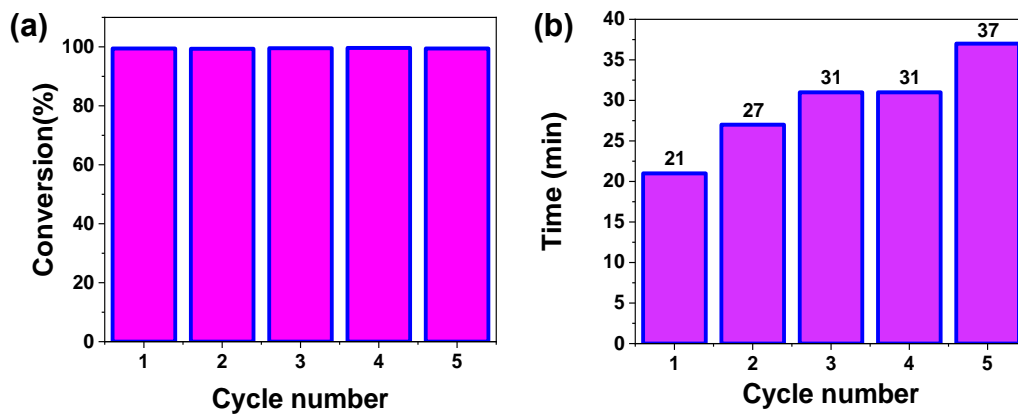

**Fig. S8** (a) Reusability of BS-2 for the reduction of 4-NP and (b) required time for each cycle for the complete reduction of 4-NP by BS-2. (Conditions: [4-NP] = 5 mM, [NaBH<sub>4</sub>] = 44.1 mM, [Cat] = 0.8 g/L).

**Table S1** Comparison of catalytic activities of different bismuth-based catalysts for 4-NP reduction.

| Catalyst                                        | $K_{\text{nor}}$                                                                                               | Ref.             |
|-------------------------------------------------|----------------------------------------------------------------------------------------------------------------|------------------|
| $\text{Bi}_2\text{S}_3$ @quasi-Bi-MOF           | $435298 \text{ s}^{-1} \text{ g}^{-1}$                                                                         | [1]              |
| Bismuth nanodots                                | $6.033 \text{ s}^{-1} \text{ g}^{-1}$                                                                          | [2]              |
| BiNPs                                           | $9.87 \text{ min}^{-1} \text{ g}^{-1}$                                                                         | [3]              |
| Bi NPs                                          | $27.51 \text{ s}^{-1} \text{ g}^{-1}$                                                                          | [4]              |
| Bi NPs/N-doped Graphene                         | $32.1 \text{ min}^{-1} \text{ mg}^{-1}$                                                                        | [5]              |
| BiNPs                                           | $0.1 \text{ s}^{-1} \text{ g}^{-1}$                                                                            | [6]              |
| Bi@Cs                                           | $242.9 \text{ s}^{-1} \text{ g}^{-1}$                                                                          | [7]              |
| $\text{Bi}_2\text{S}_3$                         | $323 \text{ min}^{-1} \text{ g}^{-1}$                                                                          | [8]              |
| QTMC-BiNPs                                      | $25.42 \text{ s}^{-1} \text{ g}^{-1}$                                                                          | [9]              |
| Au/ $\text{Bi}_2\text{Se}_3$ nanosheets         | $386.67 \text{ s}^{-1} \text{ g}^{-1}$                                                                         | [10]             |
| <b>1D-2D <math>\text{Bi}_2\text{S}_3</math></b> | <b><math>52920 \text{ s}^{-1} \text{ g}^{-1}</math><br/>(<math>882 \text{ min}^{-1} \text{ g}^{-1}</math>)</b> | <b>This work</b> |

**Table S2** Thermodynamic parameters for 4-NP reduction using BS-2 at different temperatures.

| Temperature (K) | $E_a$ (kJ/mol) | $\Delta H^\#$ (kJ/mol) | $\Delta S^\#$ (J/mol $\text{K}^{-1}$ ) | $\Delta G^\#$ (kJ/mol) |
|-----------------|----------------|------------------------|----------------------------------------|------------------------|
| 283             | 26.13          | 23.66                  | -171.48                                | 72.19                  |
| 293             |                |                        |                                        | 73.90                  |
| 303             |                |                        |                                        | 75.62                  |
| 313             |                |                        |                                        | 77.33                  |

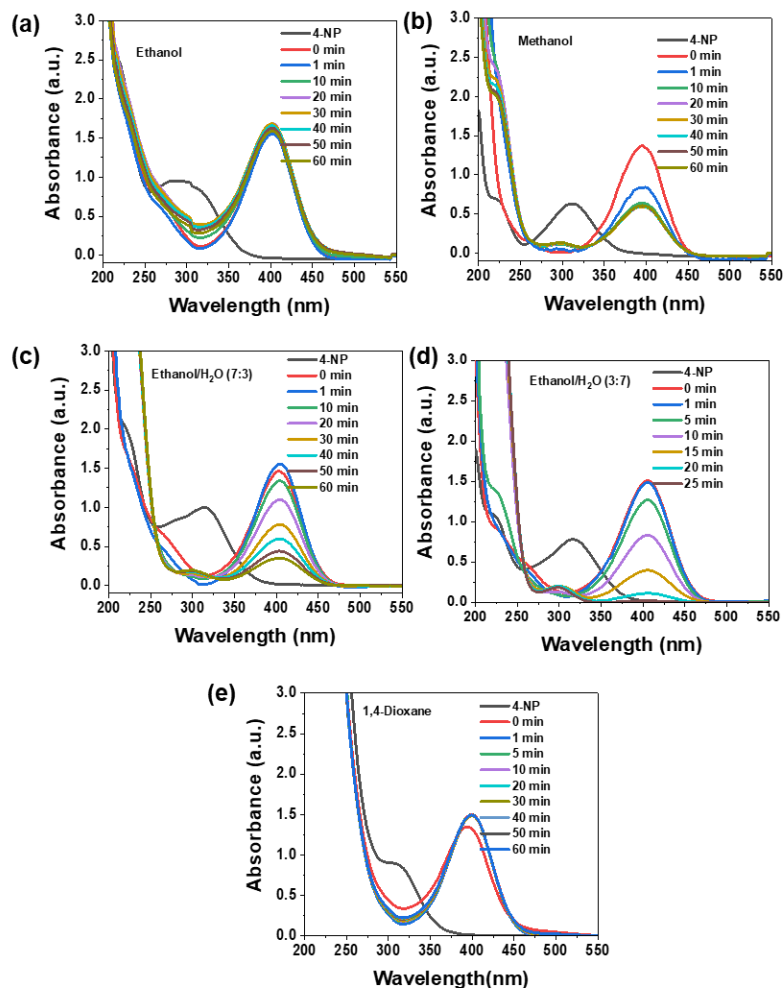

**Fig. S9** Time-dependent UV-Vis spectra of 4-NP reduction by BS-2 in solvent (a) ethanol, (b) methanol, (c) Ethanol/ H<sub>2</sub>O (7:3), (d) Ethanol/H<sub>2</sub>O (3:7), and (e) 1,4 dioxane. (Conditions: [4-NP] = 76.9  $\mu$ M, [NaBH<sub>4</sub>] = 20.3 mM, [Cat] = 0.2 g/L).

**Table S3** Effects of solvent on reduction of 4-nitrophenol over 1D-2D Bi<sub>2</sub>S<sub>3</sub> (BS-2).

| Solvent                         | Reaction time (min) | Conversion (%) |
|---------------------------------|---------------------|----------------|
| Ethanol                         | 60                  | 0              |
| Methanol                        | 60                  | 60             |
| H <sub>2</sub> O                | 8                   | 100            |
| Ethanol/ H <sub>2</sub> O (7:3) | 60                  | 77             |
| Ethanol/H <sub>2</sub> O (3:7)  | 25                  | 100            |
| 1,4-Dioxane                     | 60                  | 0              |

**Reaction conditions:** 0.2 ml of 1mM 4-nitrophenol aqueous solution; 0.053 mmol NaBH<sub>4</sub>; 2.3 ml of various solvents.

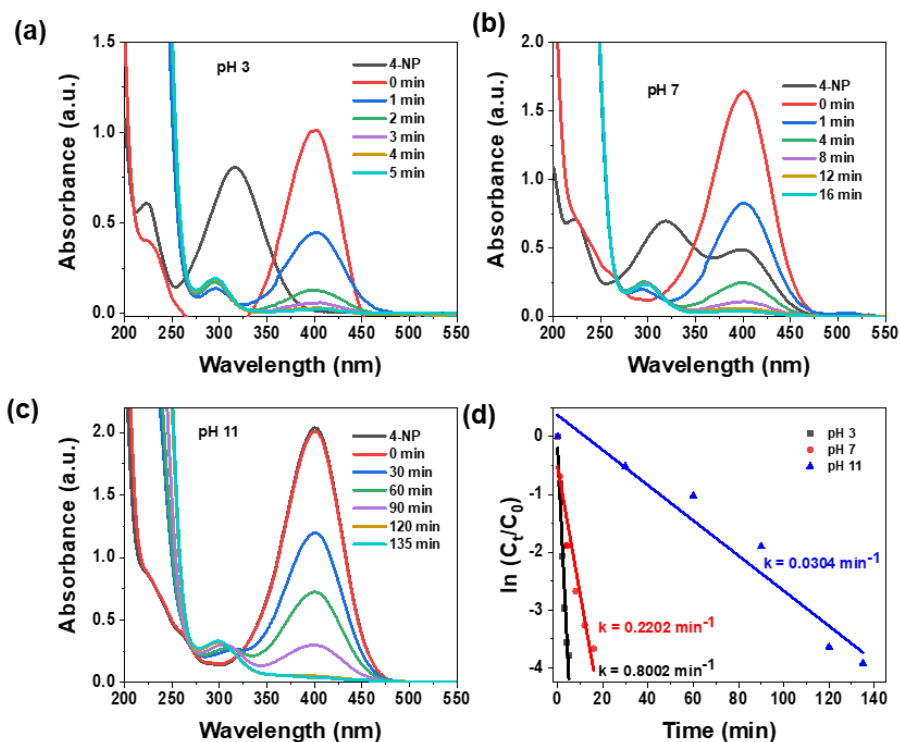

**Fig. S10** Time-dependent UV-vis spectra of 4-NP reduction by BS-2 at initial pH of 4-NP solution (a) pH 3, (b) pH 7, (c) pH 11, and (e)  $\ln(C_t/C_0)$  vs time plot. (Conditions: [4-NP] = 76.9  $\mu$ M, [NaBH<sub>4</sub>] = 20.3 mM, [Cat] = 0.2 g/L).

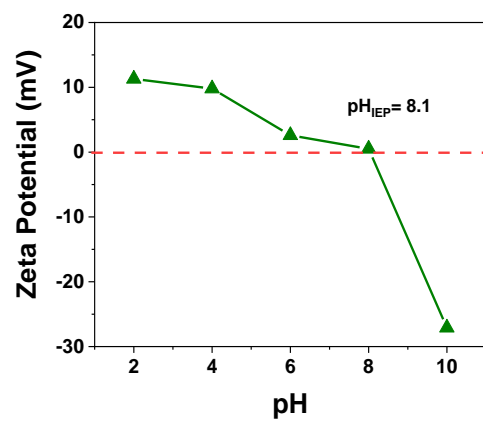

**Fig. S11**  $pH_{IEP}$  of BS-2.

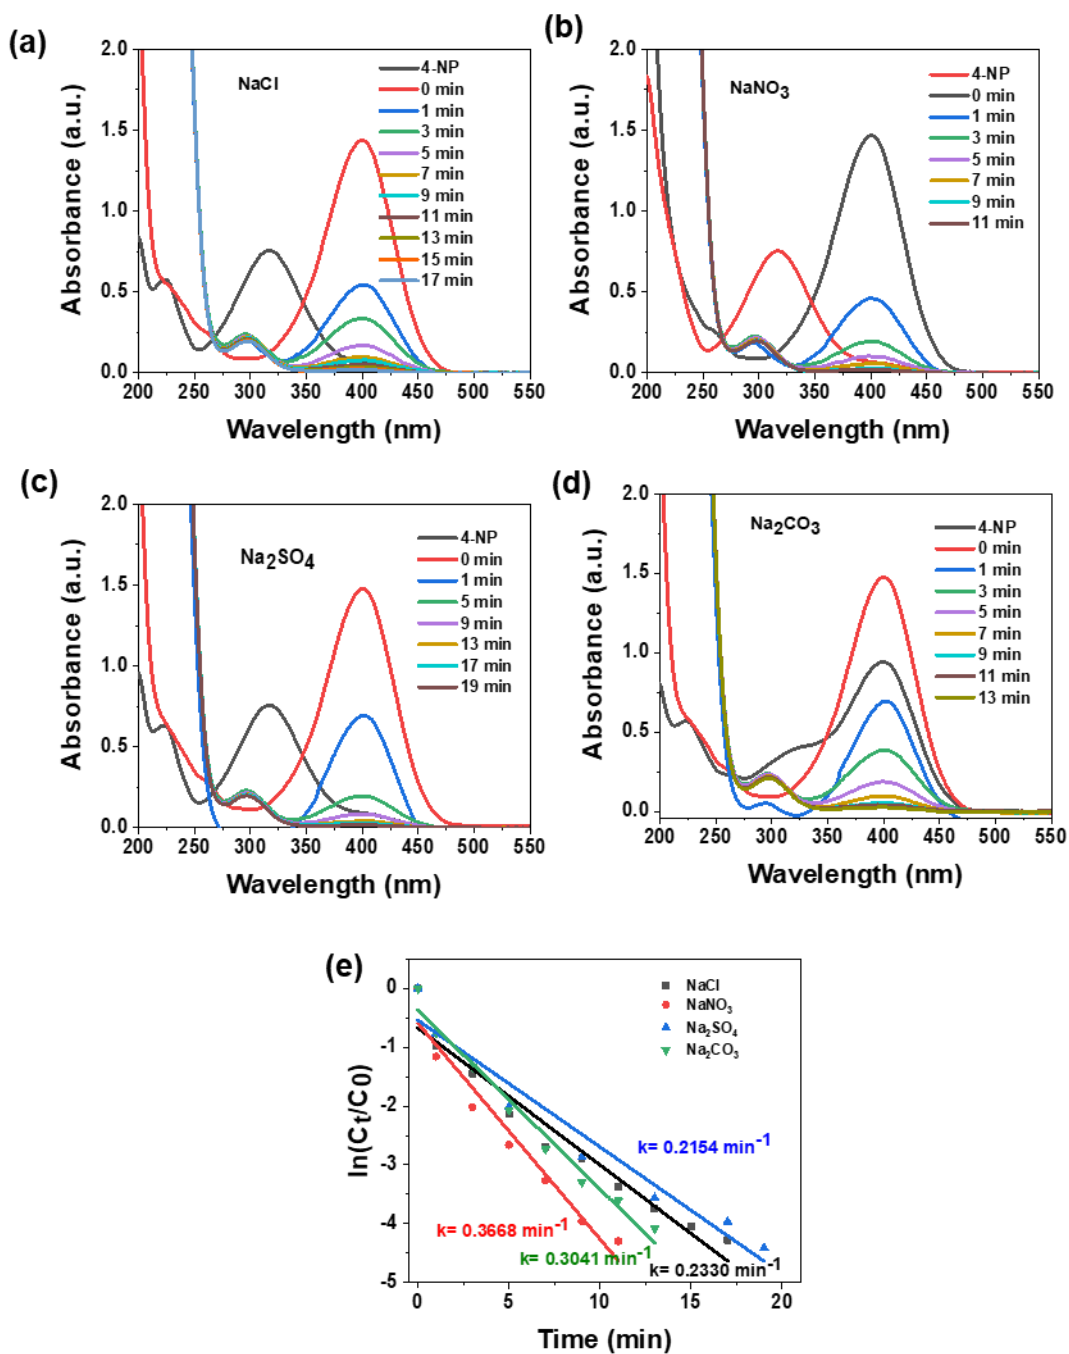

**Fig. S12** Time-dependent UV-Vis spectra of 4-NP reduction by BS-2 in the presence of anions (a) Cl<sup>-</sup>, (b) NO<sub>3</sub><sup>-</sup>, (c) SO<sub>4</sub><sup>2-</sup>, (d) CO<sub>3</sub><sup>2-</sup>, and (e)  $\ln(C_t/C_0)$  vs time plot. (Conditions: [4-NP] = 76.9  $\mu$ M, [NaBH<sub>4</sub>] = 20.3 mM, [Cat] = 0.2 g/L, [anion] = 0.1 mM).

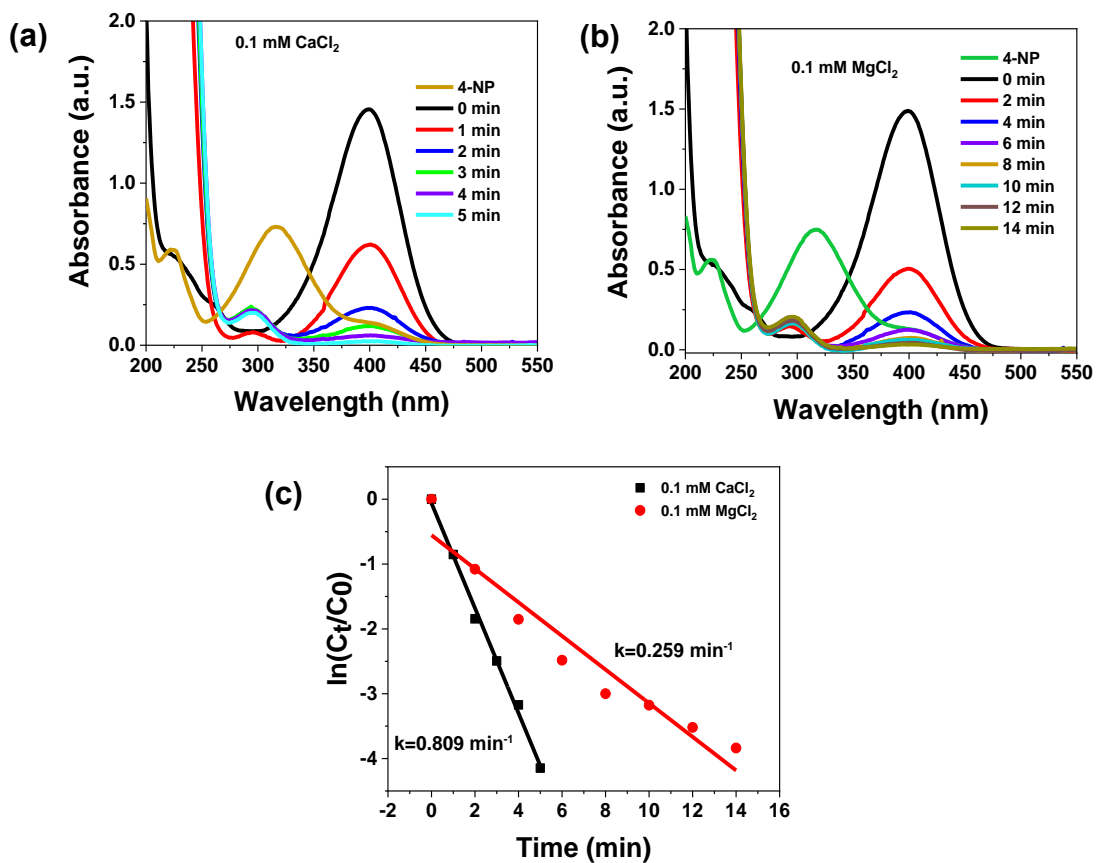

**Fig. S13** Time-dependent UV-Vis spectra of 4-NP reduction by BS-2 in the presence of cations (a)  $\text{Ca}^{2+}$ , (b)  $\text{Mg}^{2+}$ , and (c)  $\ln(C_t/C_0)$  vs time plot. (Conditions:  $[4\text{-NP}] = 76.9 \mu\text{M}$ ,  $[\text{NaBH}_4] = 20.3 \text{ mM}$ ,  $[\text{Cat}] = 0.2 \text{ g/L}$  &  $[\text{Cation}] = 0.1 \text{ mM}$ ).

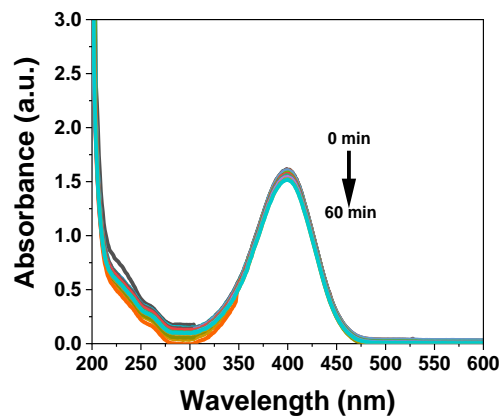

**Fig. S14** Time-dependent UV-Vis spectra of reduction of 4-NP using  $\text{Ca}^{2+}$  and  $\text{NaBH}_4$  without the use of catalyst. (Conditions:  $[\text{4-NP}] = 76.9 \mu\text{M}$ , &  $[\text{NaBH}_4] = 20.3 \text{ mM}$ ).

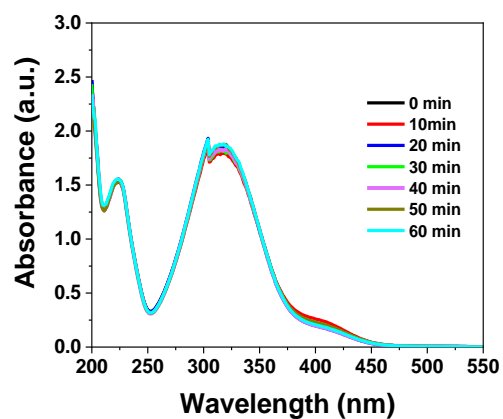

**Fig. S15** Time-dependent UV-Vis spectra for BS-2 catalyst assisted 4-NP reduction in the presence of molecular  $\text{H}_2$  gas. (Conditions:  $[\text{4-NP}] = 0.1 \text{ mM}$ , &  $[\text{Cat}] = 0.2 \text{ g/L}$ ).



**Table S4** Zeta potentials of the reaction solution in the presence of  $\text{Bi}_2\text{S}_3$  and different common anions.

| Common anions                                                                                                                                                 | None  | $\text{Na}_2\text{SO}_4$ | $\text{NaCl}$ | $\text{NaNO}_3$ | $\text{Na}_2\text{CO}_3$ |
|---------------------------------------------------------------------------------------------------------------------------------------------------------------|-------|--------------------------|---------------|-----------------|--------------------------|
| Zeta potential (mV)                                                                                                                                           | -17.6 | -14.8                    | -23.0         | -17.1           | -13.1                    |
| Conditions: $[\text{4-NP}] = 76.9 \mu\text{M}$ , $[\text{NaBH}_4] = 20.3 \text{ mM}$ , $[\text{Cat}] = 0.2 \text{ g/L}$ , $[\text{anion}] = 0.1 \text{ mM}$ . |       |                          |               |                 |                          |

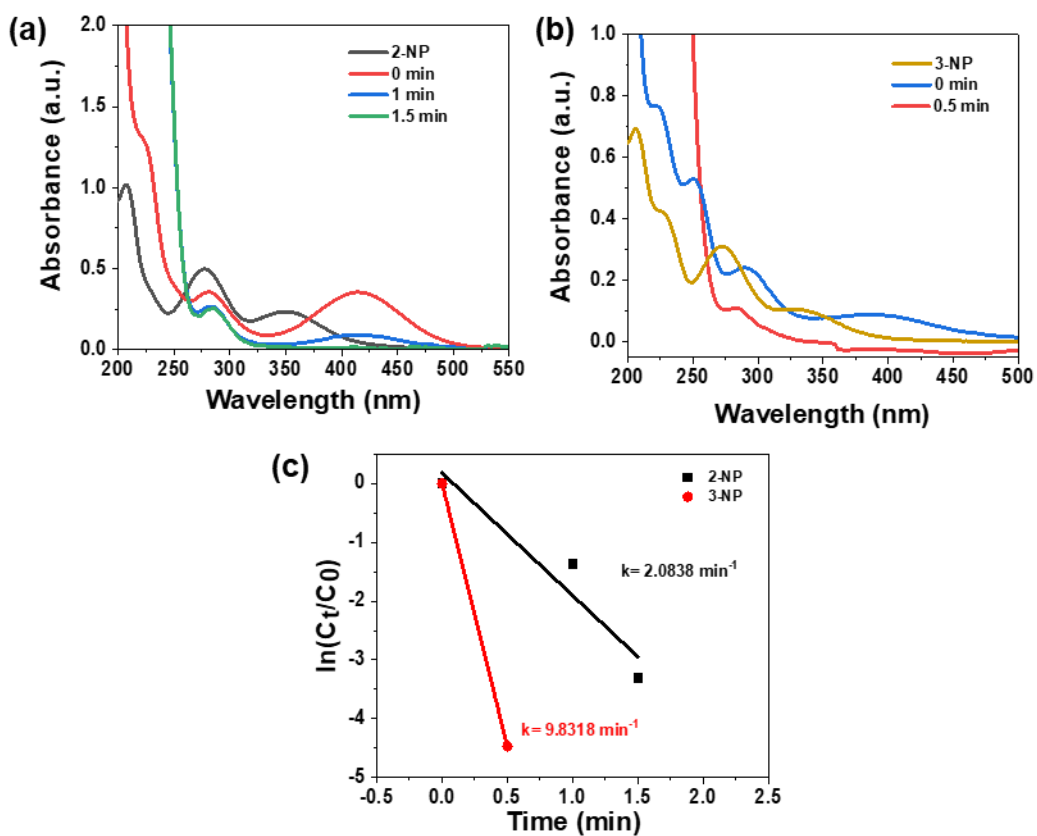

**Fig. S16** Time-dependent UV-Vis spectra of reduction of (a) 2-NP, (b) 3-NP, and (c)  $\ln(C_t/C_0)$  vs.  $t$  plots. (Conditions:  $[\text{4-NP}] = 76.9 \mu\text{M}$ ,  $[\text{NaBH}_4] = 20.3 \text{ mM}$ ,  $[\text{Cat}] = 0.2 \text{ g/L}$ ).

**Table S5** Catalytic Reduction Activity of Diverse Nitroarenes by the BS-2.

| Entry | Substrate                                                                         | Product                                                                           | Time (min) | TOF (h <sup>-1</sup> ) |
|-------|-----------------------------------------------------------------------------------|-----------------------------------------------------------------------------------|------------|------------------------|
| 1     | 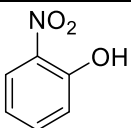 |  | 1.5        | 8.2305                 |
| 2     |  |  | 0.5        | 24.6913                |
| 3     |  |  | 8          | 1.5432                 |

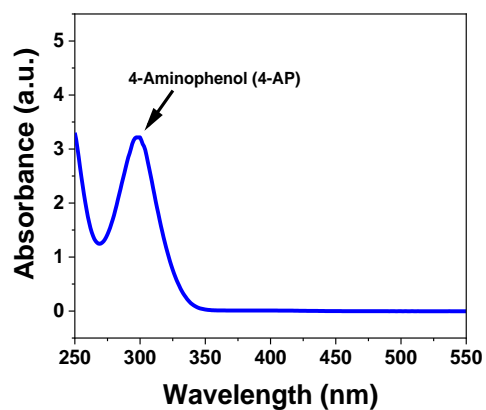

**Fig. S17** Product confirmation from large scale reduction of 4-NP.

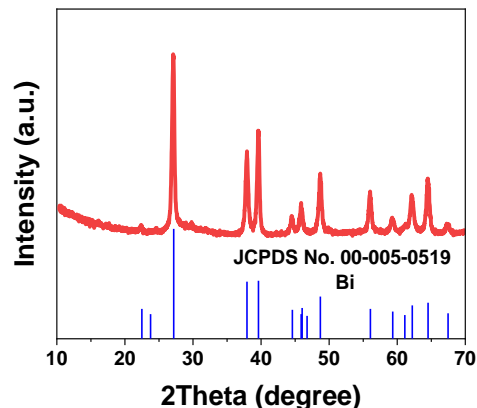

**Fig S18.** P-XRD pattern of BS-2 catalyst after introducing NaBH<sub>4</sub> to BS-2 without the 4-NP.

### Calculation of turnover number (TON) and turnover frequency (TOF) of 4-nitrophenol to 4-aminophenol catalyzed by 1D-2D Bi<sub>2</sub>S<sub>3</sub>

The efficacy of a catalyst for 4-nitrophenol reduction can be determined by the turnover number (TON) and turnover frequency (TOF). TON is calculated using number of moles of substrate convert into products per mole of catalyst.

$$\text{TON} = \frac{\text{Number of moles of 4-NP reduced to 4-AP}}{\text{Number of moles of catalyst}}$$

TOF is defined as the number of moles of 4-NP reduced to 4-AP per mole of catalyst per hour. It is calculated by dividing TON by reaction time.

$$\text{TOF (h}^{-1}\text{)} = \frac{\text{TON}}{\text{Reaction time (in h)}}$$

In other words,

$$\text{TOF (h}^{-1}\text{)} = \frac{\text{Number of moles of 4-NP reduced to 4-AP}}{\text{Number of moles of catalyst} \times \text{reaction time (h)}}$$

Moles of conversion of 4-NP to 4-AP =  $C_{4\text{-NP}} \times V_{4\text{-NP}}$

Where  $C_{4\text{-NP}}$  = molar concentration of 4-NP (1mM or 1mmol/L)

$V_{4\text{-NP}}$  = Volume of 4-NP (200  $\mu\text{l}$ )

$\therefore$  Moles of 4-NP to 4-AP = 1 mmol/L \* 200  $\mu\text{l}$

$$= 2 \times 10^{-7} \text{ moles}$$

No. of Moles of catalyst =  $\frac{\text{Mass concentration of Bi}_2\text{S}_3 \times \text{Volume of Bi}_2\text{S}_3}{\text{Relative molecular mass of Bi}_2\text{S}_3}$

Mass concentration of  $\text{Bi}_2\text{S}_3$  = 5 mg/ml

Volume of  $\text{Bi}_2\text{S}_3$  taken = 100  $\mu\text{l}$

Relative molecular mass of  $\text{Bi}_2\text{S}_3$  = 514.16 g/mol

$\therefore$  Moles of  $\text{Bi}_2\text{S}_3$  = (5 mg/ml \* 100  $\mu\text{l}$ ) / 514.16 g/mol

$$= 9.72 \times 10^{-7} \text{ moles}$$

$$\text{TON} = \frac{2 \times 10^{-7} \text{ moles}}{9.72 \times 10^{-7} \text{ moles}} = 0.2057$$

TOF ( $\text{h}^{-1}$ ) =  $0.2057 / 8 \text{ min}^{-1} = 0.02571 \text{ min}^{-1} = 1.543 \text{ h}^{-1}$

**Table S6:** Comparison of thermodynamic parameters for 4-NP reduction presented in literatures and this work.

| <b>Samples</b>                                                       | <b>E<sub>a</sub></b><br><b>(kJ mol<sup>-1</sup>)</b> | <b>ΔH<sup>#</sup></b><br><b>(kJ mol<sup>-1</sup>)</b> | <b>ΔS<sup>#</sup></b><br><b>(J mol<sup>-1</sup> K<sup>-1</sup>)</b> | <b>ΔG<sup>#</sup></b><br><b>(kJ mol<sup>-1</sup>)</b>                    | <b>References</b> |
|----------------------------------------------------------------------|------------------------------------------------------|-------------------------------------------------------|---------------------------------------------------------------------|--------------------------------------------------------------------------|-------------------|
| Bi/N-doped Graphene                                                  | 29.1                                                 | -                                                     | -                                                                   | -                                                                        | [5]               |
| 20% Bi <sub>2</sub> S <sub>3</sub> /NiCo <sub>2</sub> O <sub>4</sub> | 26.27                                                | 25.02                                                 | -197.46                                                             | 83.86 (at 298 K)                                                         | [8]               |
| 1D-2D Bi <sub>2</sub> S <sub>3</sub>                                 | 26.13                                                | 23.66                                                 | -171.48                                                             | 72.19 (at 283K)<br>73.90 (at 293K)<br>75.62 (at 303K)<br>77.33 (at 313K) | <b>This work.</b> |

## References:

- [1] J. Jiang, W. Wei, Y. Tang, S. Yang, X. Wang, Y. Xu, L. Ai, In Situ Implantation of  $\text{Bi}_2\text{S}_3$  Nanorods into Porous Quasi-Bi-MOF Architectures: Enabling Synergistic Dissociation of Borohydride for an Efficient and Fast Catalytic Reduction of 4-Nitrophenol, *Inorg. Chem.*, 61 (2022) 19847-19856.
- [2] Y. Liang, J. Manioudakis, J.-R. Macairan, M.S. Askari, P. Forgione, R. Naccache, Facile aqueous-phase synthesis of an ultrasmall bismuth nanocatalyst for the reduction of 4-nitrophenol, *ACS omega*, 4 (2019) 14955-14961.
- [3] M. Mahiuddin, B. Ochiai, Comprehensive study on lemon juice-based green synthesis and catalytic activity of bismuth nanoparticles, *ACS omega*, 7 (2022) 35626-35634.
- [4] F. Xia, X. Xu, X. Li, L. Zhang, L. Zhang, H. Qiu, W. Wang, Y. Liu, J. Gao, Preparation of bismuth nanoparticles in aqueous solution and its catalytic performance for the reduction of 4-nitrophenol, *Ind. Eng. Chem. Res.*, 53 (2014) 10576-10582.
- [5] S. Li, Y. Yang, L. Liu, Q. Zhao, Electron transfer-induced catalytic enhancement over bismuth nanoparticles supported by N-doped graphene, *J. Chem. Eng.*, 334 (2018) 1691-1698.
- [6] M. Mahiuddin, B. Ochiai, Green synthesis of crystalline bismuth nanoparticles using lemon juice, *RSC Adv.*, 11 (2021) 26683-26686.
- [7] J. Zhou, J. Gao, X. Xu, W. Hong, Y. Song, R. Xue, H. Zhao, Y. Liu, H. Qiu, Synthesis of porous  $\text{Bi}@ \text{Cs}$  networks by a one-step hydrothermal method and their superior catalytic activity for the reduction of 4-nitrophenol, *J. Alloys Compd.*, 709 (2017) 206-212.
- [8] F.M. Valadi, E. Akbarzadeh, M.R. Gholami, Efficient reduction of organic pollutants by novel magnetic  $\text{Bi}_2\text{S}_3/\text{NiCo}_2\text{O}_4$  MOF-derived composite: Experimental and DFT investigation, *J. Mol. Liq.*, 367 (2022) 120574.
- [9] Y.A. Alli, S. Adewuyi, B.S. Bada, S. Thomas, H. Anuar, Quaternary trimethyl chitosan chloride capped bismuth nanoparticles with positive surface charges: catalytic and antibacterial activities, *J. Clust. Sci.*, 33 (2022) 2311-2324.
- [10] L. Xiao, A. Zhu, Q. Xu, Y. Chen, J. Xu, J. Weng, Colorimetric biosensor for detection of cancer biomarker by Au nanoparticle-decorated  $\text{Bi}_2\text{Se}_3$  nanosheets, *ACS Appl. Mater. Interfaces.*, 9 (2017) 6931-6940.
